# Supplementary material for: Retinal ganglion cell survival after severe optic nerve injury is modulated by crosstalk between Jak/Stat signaling and innate immune responses in the zebrafish retina
Source: Oxford University Press journal article supplement (doi:10.1242/dev.199694), 2021-09-16
Supplement: dev199694supp.pdf [file dev199694supp.pdf]

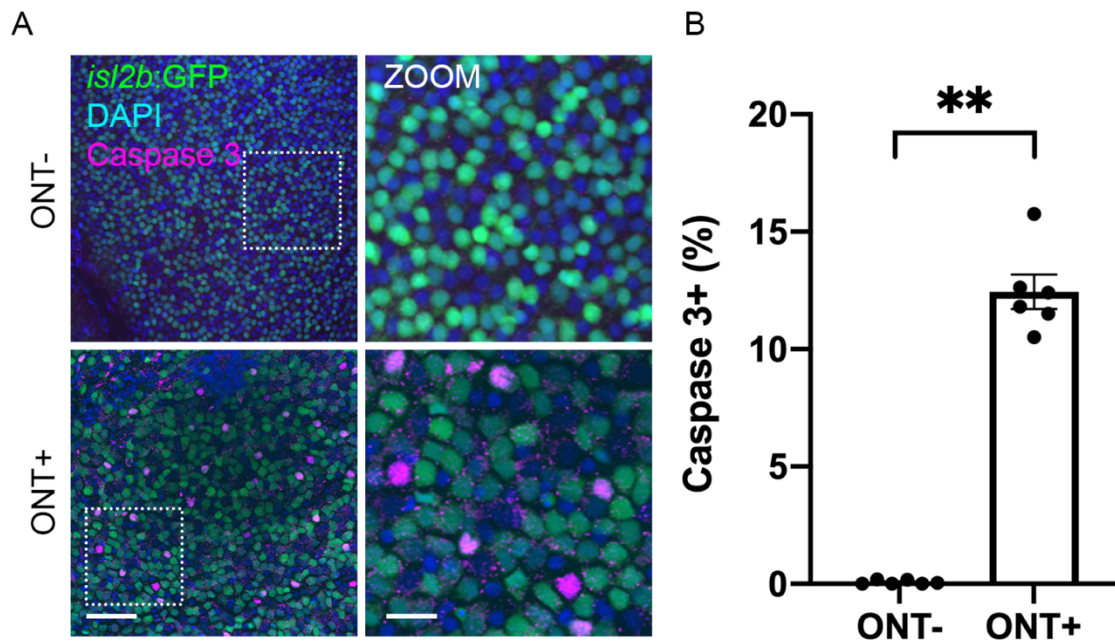

**Fig. S1. Cleaved caspase-3 expression in the ganglion cell layer after optic nerve transection.**

**(A)** Cleaved caspase-3 (magenta) expression in *isl2b:GFP*<sup>+</sup> (green) flat-mount retinæ at 7dpi. DAPI (blue) counterstain for nuclei. **(B)** Quantification of the percentage of cleaved caspase-3<sup>+</sup> RGCs in the ganglion cell layer after ONT (n=6/condition). Shown are mean±SEM; \*\*p<0.01; Mann-Whitney test. Data derived from 3 experiments. Scale bars = 50µm and 150µm on zoomed images.

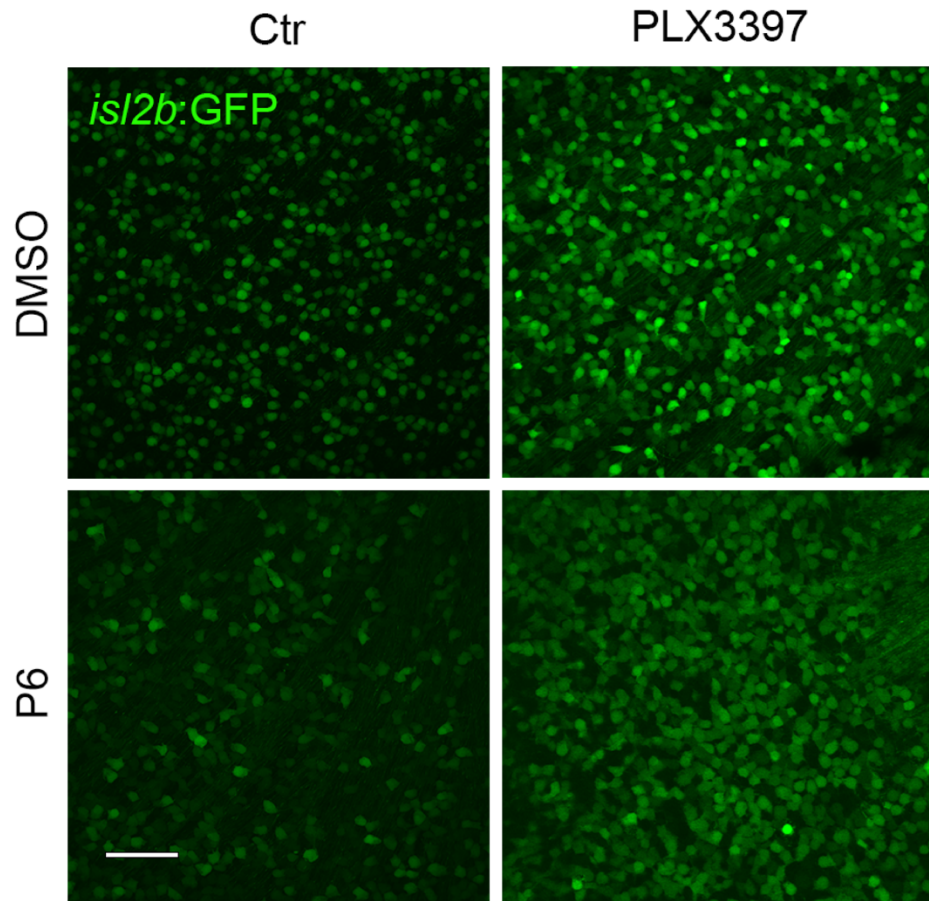

**Fig. S2. RGC survival after Jak inhibition and macrophage/microglia depletion.**

Flat-mount images of *is/2b:GFP* retinae after intravitreal injection of P6 or DMSO +/- PLX3397 treatment at 7dpi. Data derived from 3 experiments. Scale bars = 50 $\mu$ m.

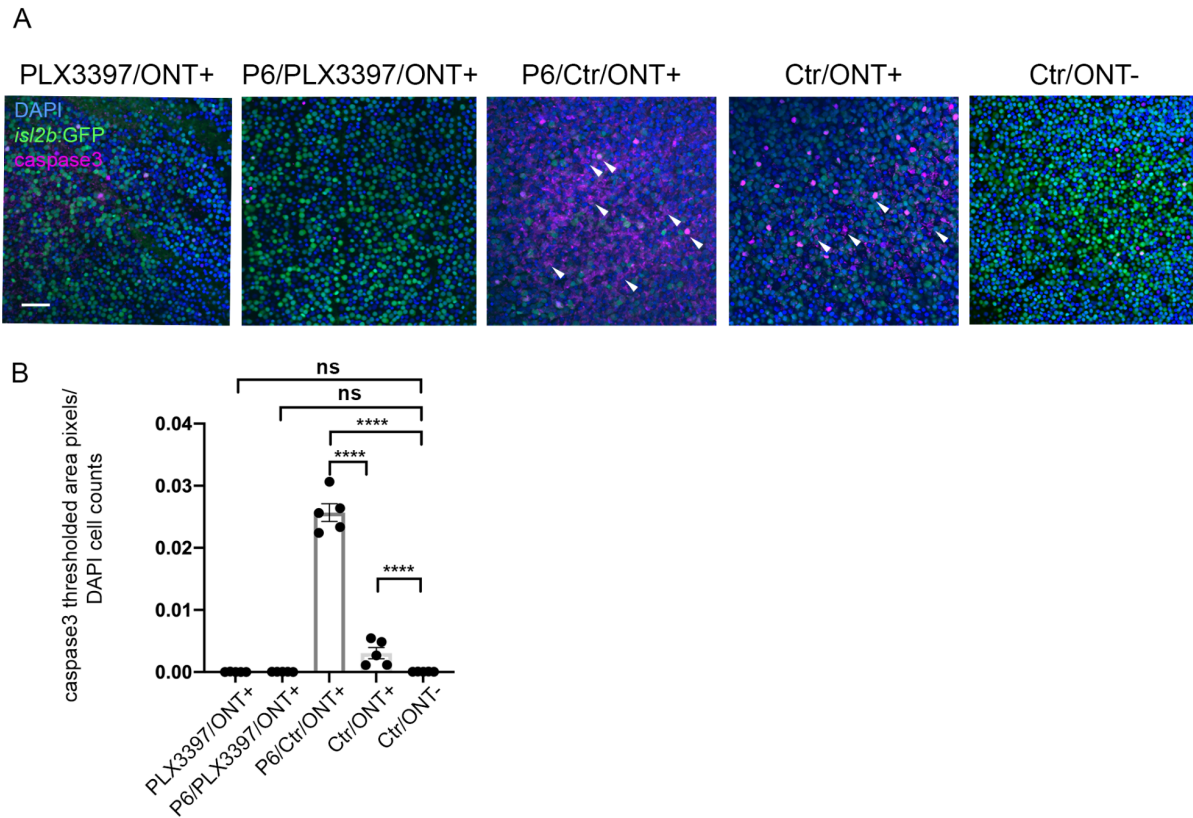

**Fig. S3. Cleaved caspase-3 staining after JAK inhibition and macrophage/microglia depletion.**

**(A)** Cleaved caspase-3 (magenta) expression in *is/2b:GFP*<sup>+</sup> (green) flat-mount retinæ at 7dpi. DAPI (blue) counterstain for nuclei. Scale bar=50  $\mu$ m. **(B)** Quantification of the ratio of the thresholded area pixels of cleaved caspase-3<sup>+</sup> staining to counts of DAPI cells in the ganglion cell layer (n=5/condition). Shown are mean $\pm$ SD; \*\*\*\* $p$ <0.0001; Kruskal Wallis ANOVA with Dunn's multiple comparisons. Data derived from 2 experiments.

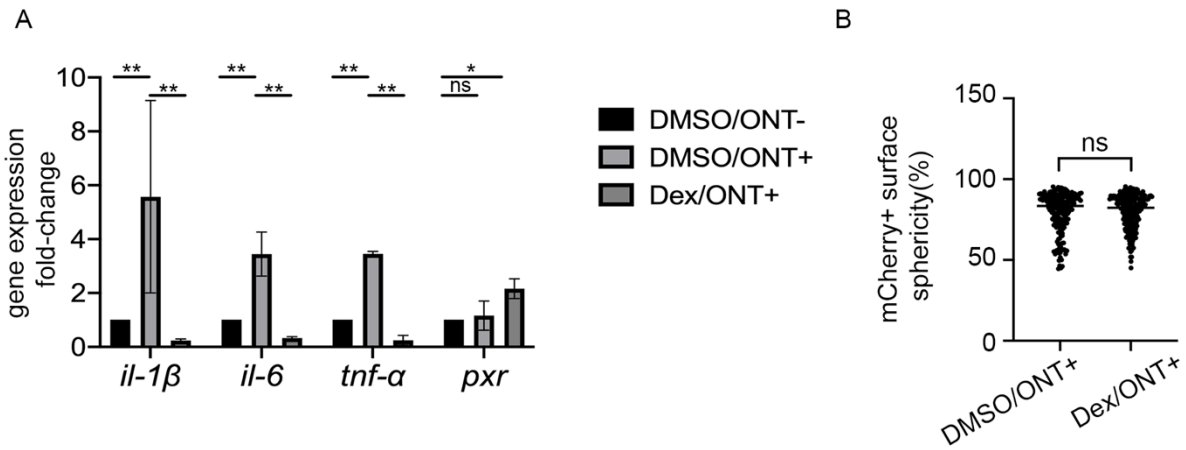

**Fig. S4. Quantification of sphericity of macrophages/microglia and qRT-PCR after dexamethasone application.**

**(A)** qRT-PCR for *il1-β*, *il6*, *tnf-α* and a downstream transcriptional target of dexamethasone *pxr* (Pascussi et al. 2000) expression in retinae treated with 10μM dexamethasone or 0.05%DMSO at 7dpi, expression fold change of above genes in DMSO/ONT- retinae were normalized to 1 as the control. *gapdh* were used as the housekeeping gene. Shown are mean±SD; \*\*p<0.01; \*p<0.05. Kruskal Wallis ANOVA with Dunn's multiple comparisons. Data derived from 3 experiments. **(B)** Quantification of the sphericity of mCherry+ surfaces after dexamethasone application at 7dpi. Violin plot showing no significant differences in sphericity of mCherry+ macrophages/microglia in Dex/ONT+ retinae compared to DMSO/ONT+ controls (n=180 in Dex/ONT+ and n=198 in DMSO/ONT+); p=0.4235, unpaired t-test with Welch's correction.

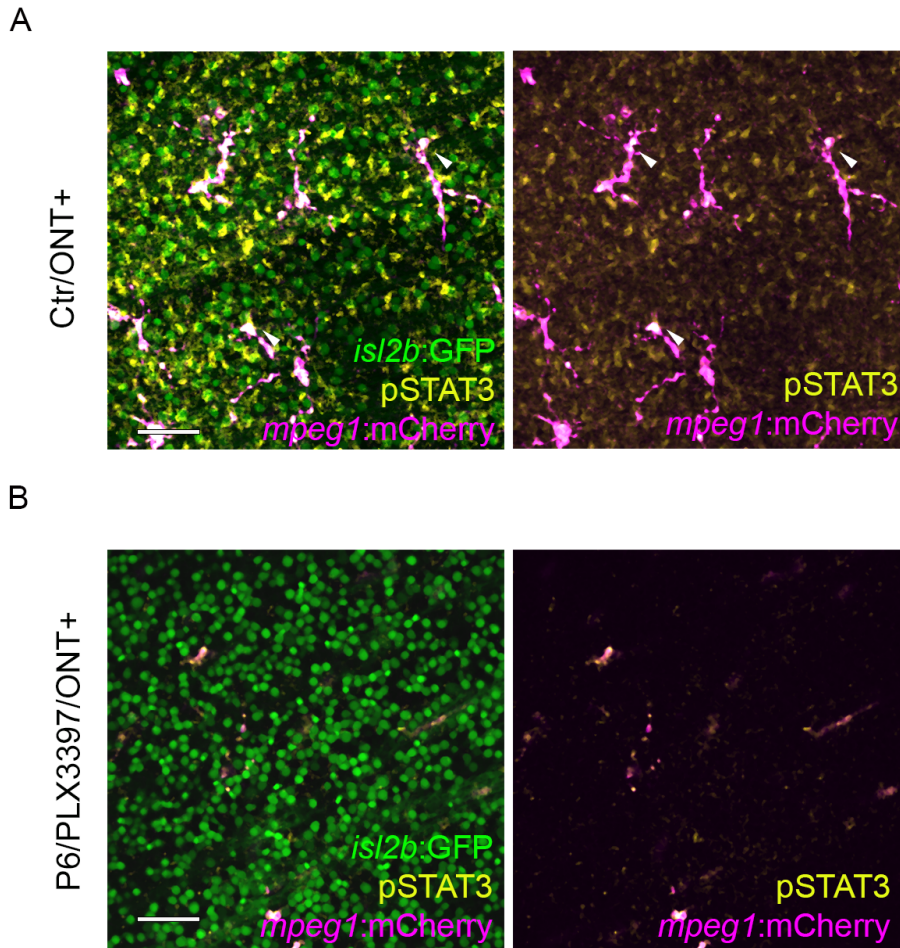

**Fig. S5. JAK/STAT pathway activity in macrophages/microglia and after P6/PLX3397 treatment.**

**(A)** Flat-mount images showing pSTAT3 staining (yellow) on *isl2b:GFP*;*mpeg1:mCherry* (*isl2b:GFP* – green; *mpeg1:mCherry* - magenta) retinæ at 7dpi. Image to right has *isl2b:GFP* channel removed. **(B)** Flat-mount images showing pSTAT3 staining on *isl2b:GFP*;*mpeg1:mCherry* (*isl2b:GFP* – green; *mpeg1:mCherry* - magenta) retinæ after P6/PLX3397 treatment or housed in system water and injected with 0.05% DMSO (Ctr) at 7dpi. Image to right has *isl2b:GFP* channel removed. Scale bar=50µm.

**Table S1.** Sequences of q-PCR primers

[Click here to download Table S1](#)

**Table S2.** 56 up-regulated genes at 24hpi (filtering parameters used: the maximum of the average group RPKM value  $>1.5$ , fold change  $>2$ , false discovery rate (FDR) p-value  $<0.05$ . Genes with TPM=0 in one or more replicates were excluded.

[Click here to download Table S2](#)

**Table S3.** 252 down-regulated genes at 24hpi (filtering parameters used: the maximum of the average group RPKM value  $>1.5$ , fold change  $>2$ , false discovery rate (FDR) p-value  $<0.05$ . Genes with TPM=0 in one or more replicates were excluded.

[Click here to download Table S3](#)

**Table S4.** 5 up-regulated genes and 3 down-regulated genes at 12hpi (filtering parameters used: the maximum of the average group RPKM value  $>1.5$ , absolute fold change  $>2$ , false discovery rate (FDR) p-value  $<0.05$ . Genes with TPM=0 in one or more replicates were excluded. )

[Click here to download Table S4](#)

**Table S5.** 49 up-regulated genes at 12hpi (filtering parameters used: the maximum of the average group RPKM value  $>1.5$ , fold change  $>2$ , p-value  $<0.05$ . Genes with TPM=0 in one or more replicates were excluded.

[Click here to download Table S5](#)

**Table S6.** 31 down-regulated genes at 12hpi (filtering parameters used: the maximum of the average group RPKM value  $>1.5$ , fold change  $< -2$ , p-value  $<0.05$ . Genes with TPM=0 in one or more replicates were excluded.

[Click here to download Table S6](#)

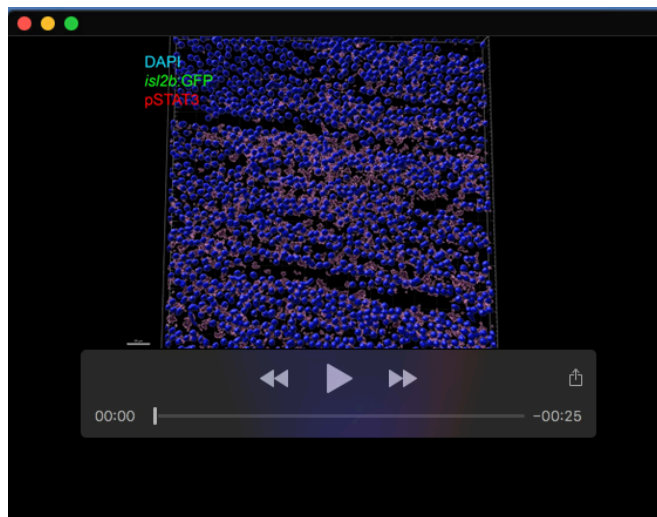

**Movie 1.** Surfaces of pStat3 staining generated in Imaris. Scale bar = 20 $\mu$ m.

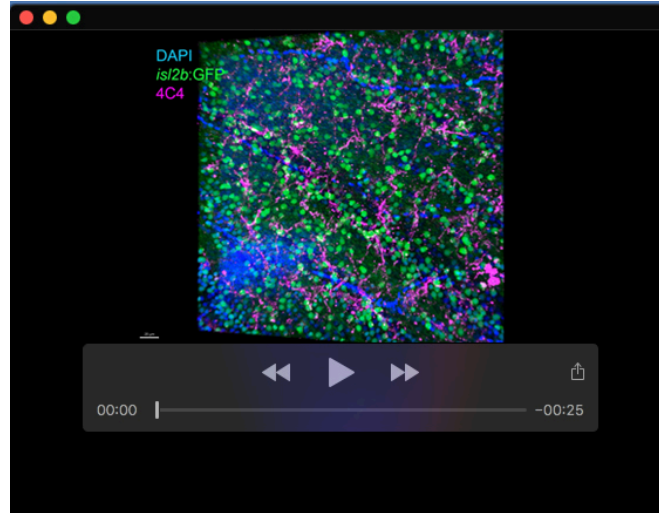

**Movie 2.** 3D image of 4C4 staining generated in Imaris. Scale bar = 20 $\mu$ m.
